# Supplementary material for: Spatiotemporal Characteristics and Risk Factors of the COVID-19 Pandemic in New York State: Implication of Future Policies
Source: MDPI journal article supplement (doi:10.3390/ijgi10090627), 2021-09-18
Supplement: s1 [file s1]

# Spatiotemporal Characteristics and Risk Factors of the COVID-19 Pandemic in New York State: Implication of Future Policies

Anran Zheng<sup>1+</sup>, Tao Wang<sup>1,\*</sup>, and Xiaojuan Li<sup>1</sup>

<sup>1</sup> College of Geospatial Information Science and Technology, Capital Normal University, North Road 105, Haidian District, Beijing, 100048 China; 1173603035@cnu.edu.cn(A.Z.), lixiaojuan@cnu.edu.cn(X.L.)

\* Correspondence: wangt@cnu.edu.cn; Tel.: +86-10-68903472

+ Current address: Stuart Weitzman School of Design, University of Pennsylvania, 210 South 34th Street, Philadelphia, PA 19104, United States, anranz@design.upenn.edu.

## Supplementary Information

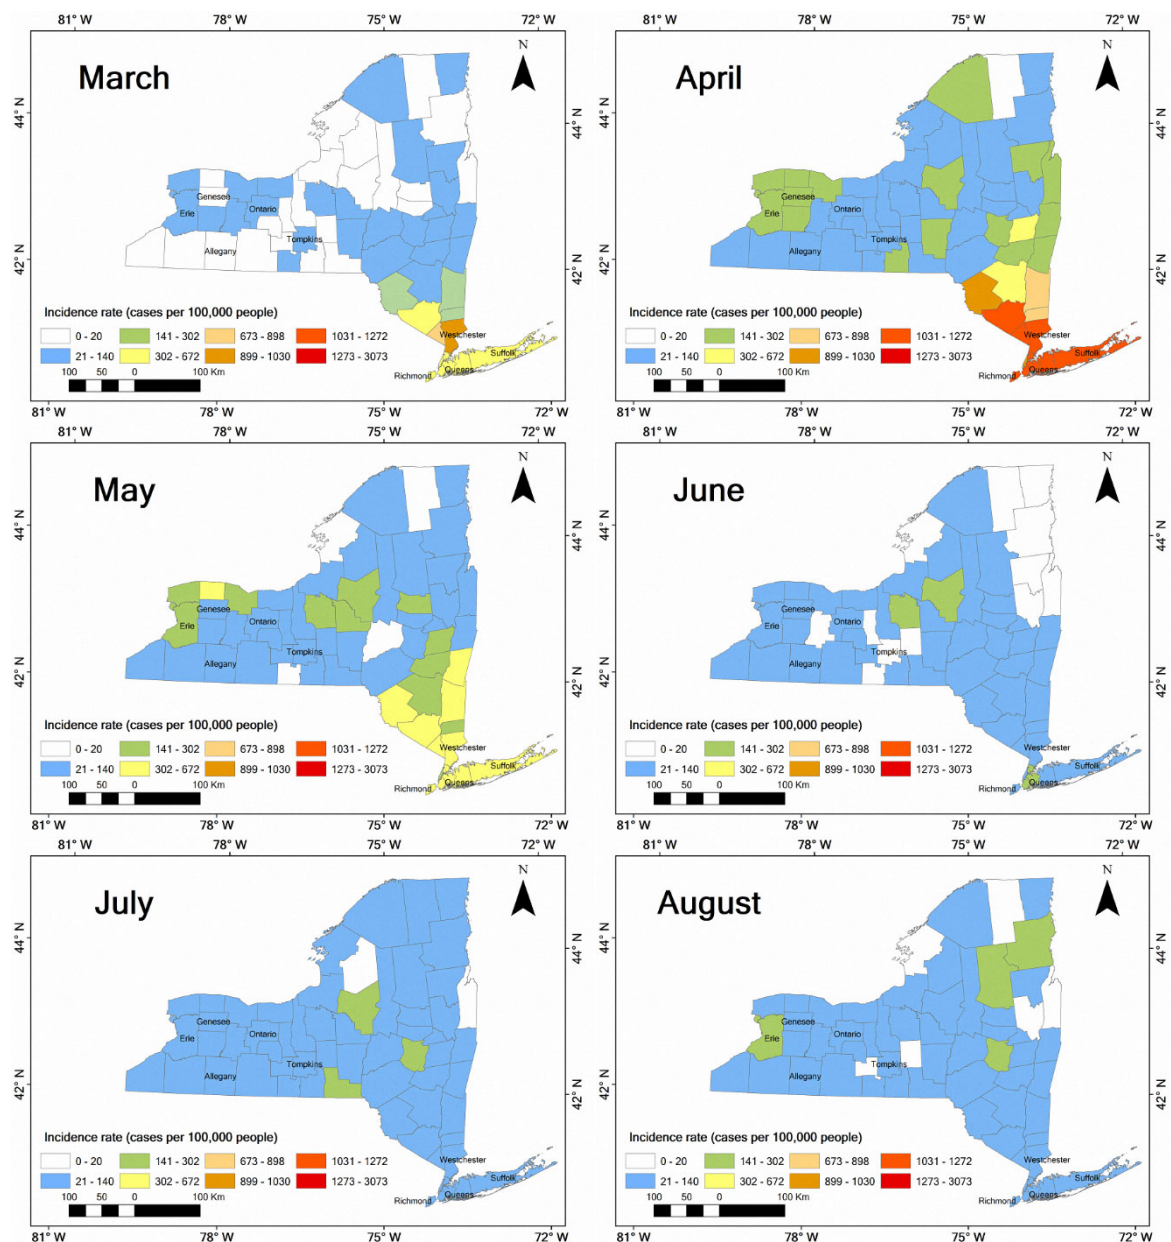

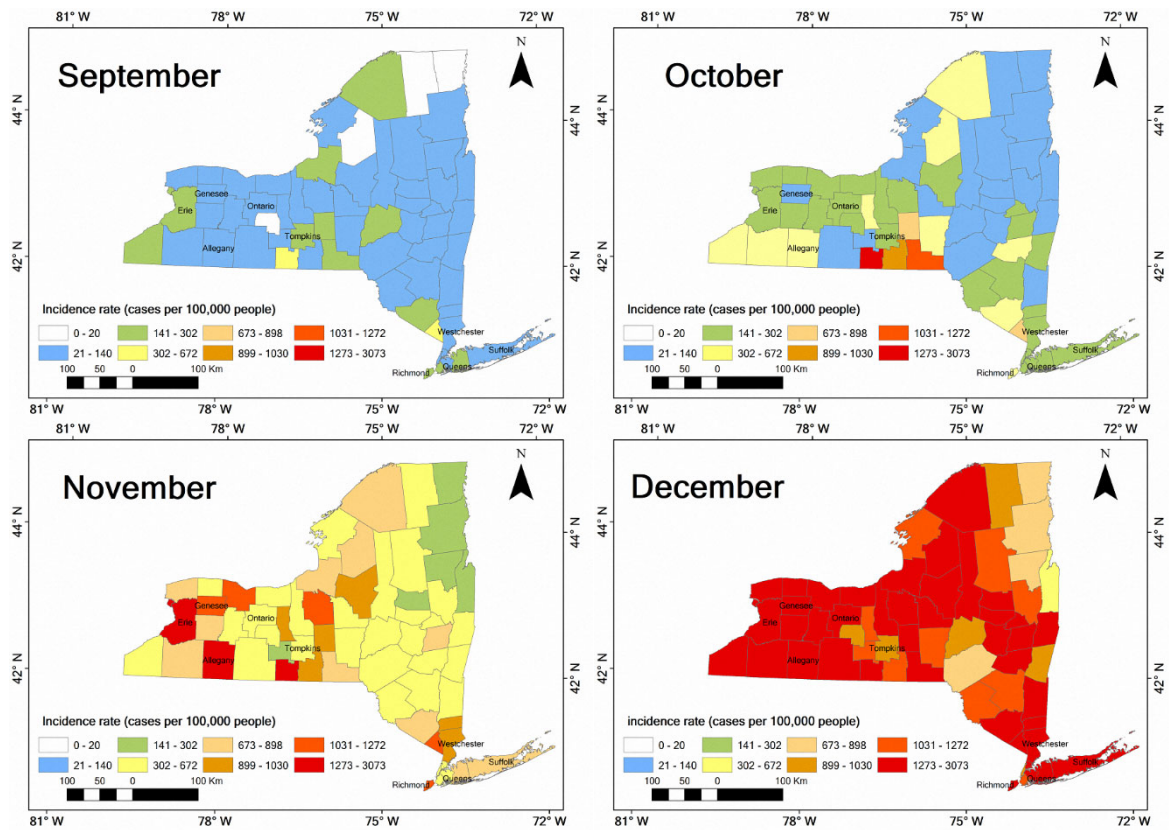

**Figure S1.** Distribution of Monthly Incidence of COVID-19 in New York State (March-December 2020).

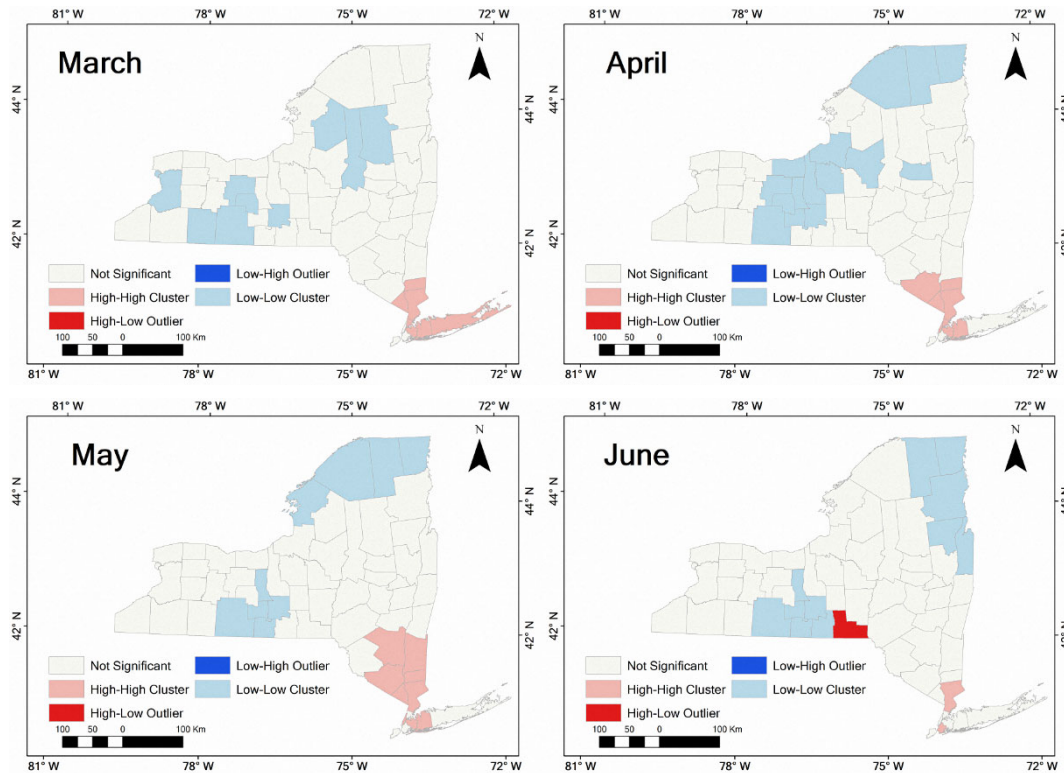

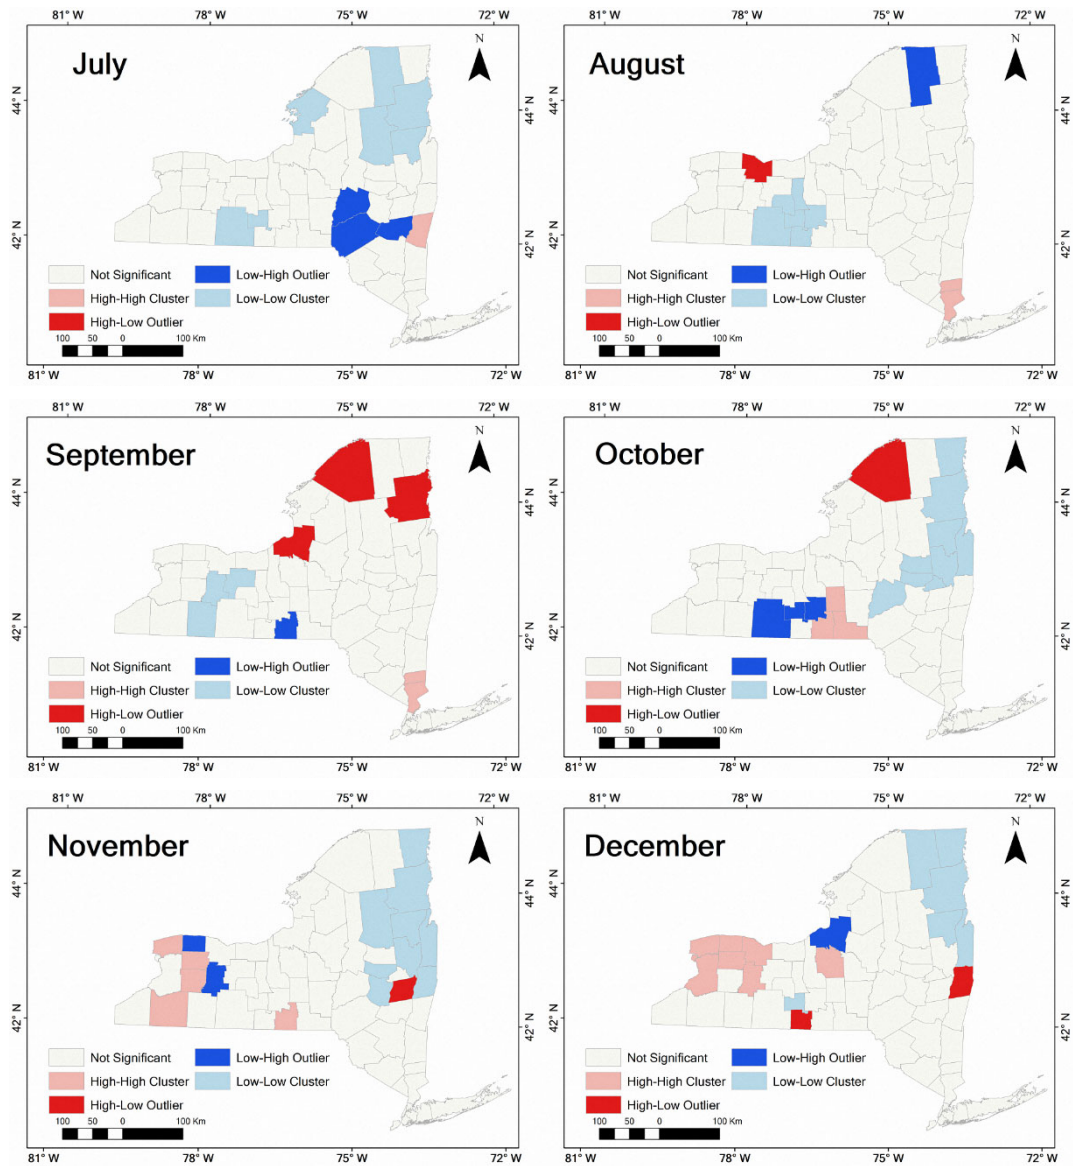

**Figure S2.** Cluster distribution of confirmed cases of COVID-19 in New York (March-December 2020).

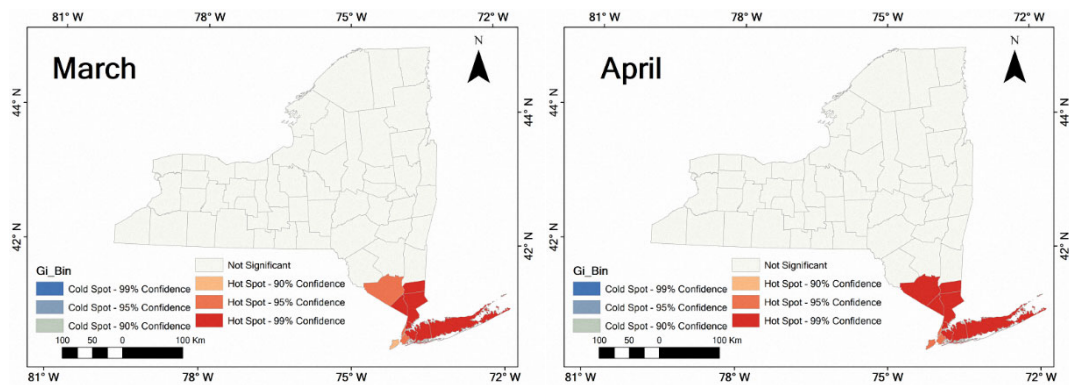



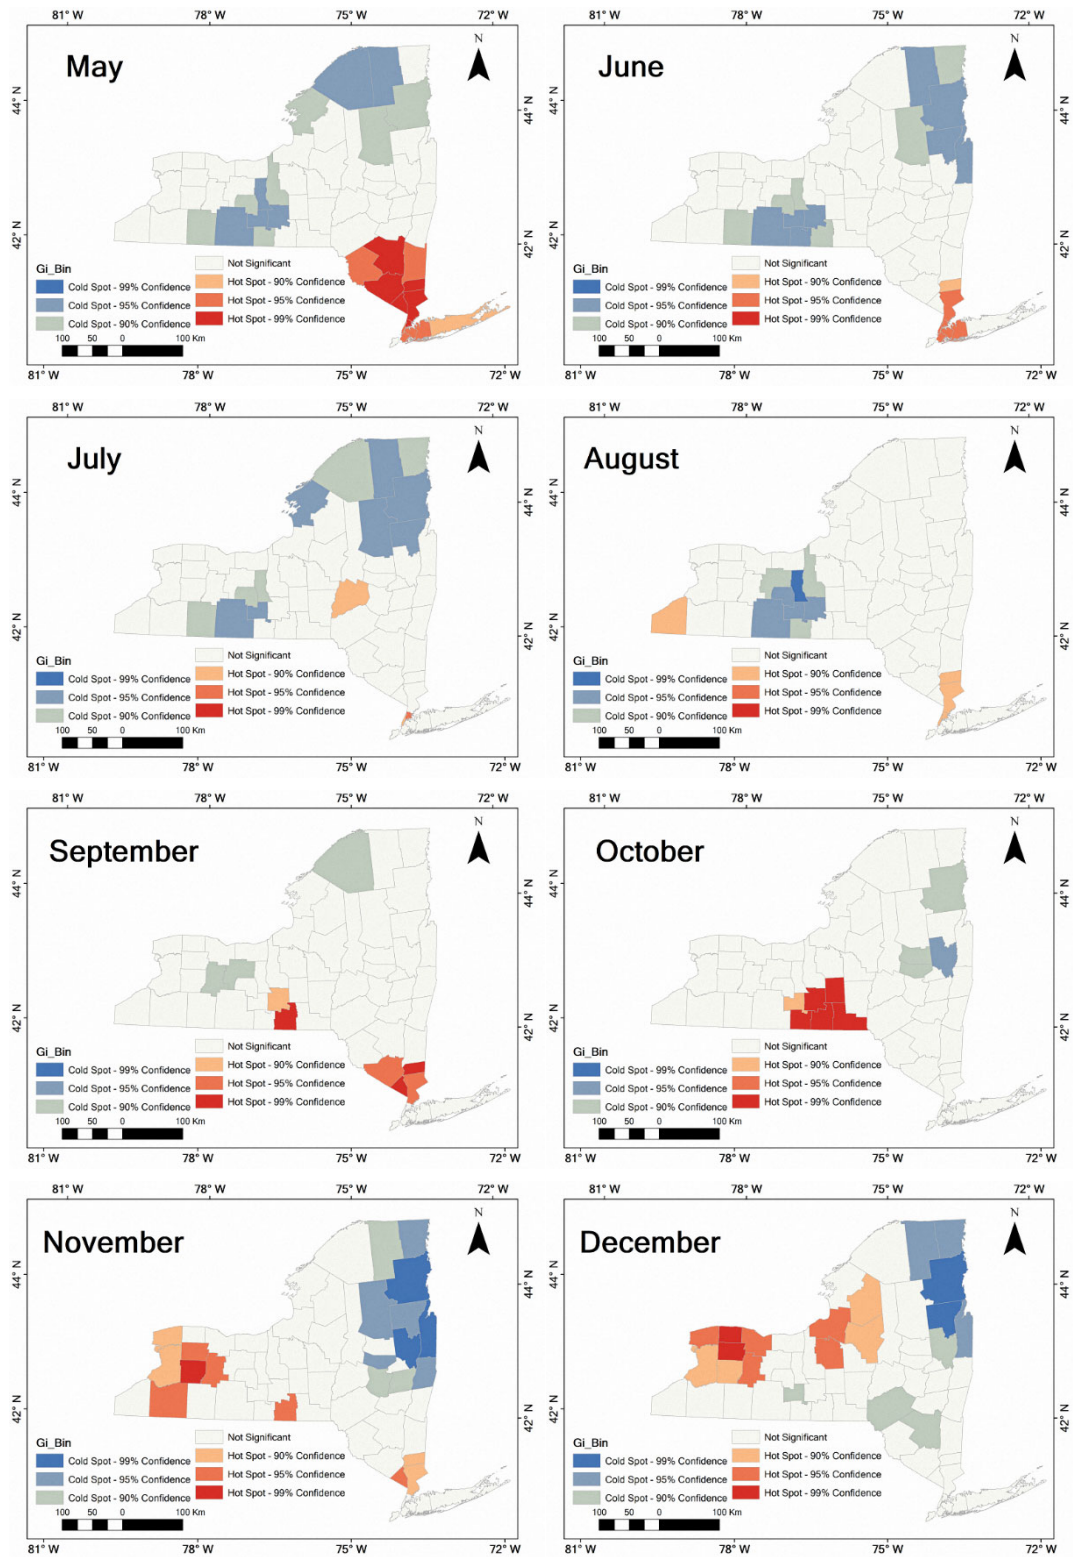

**Figure S3.** LISA cluster distribution map of the incidence of COVID-19 in New York State (March-December 2020).

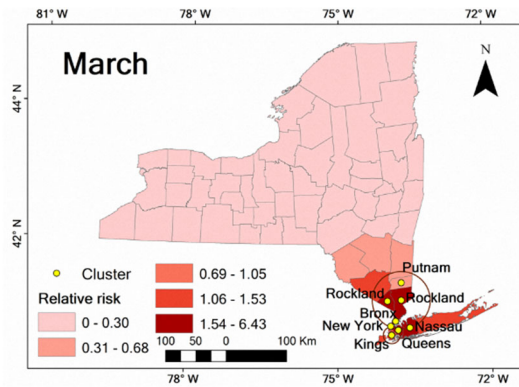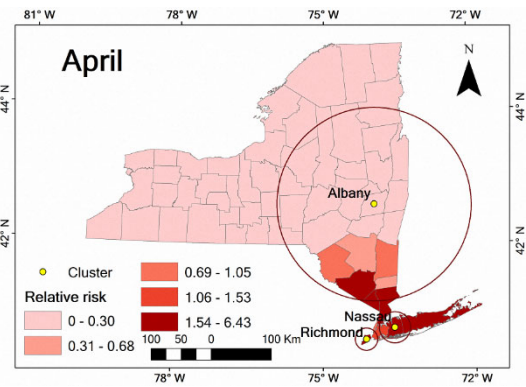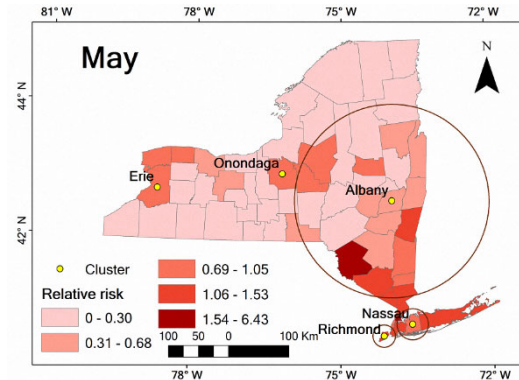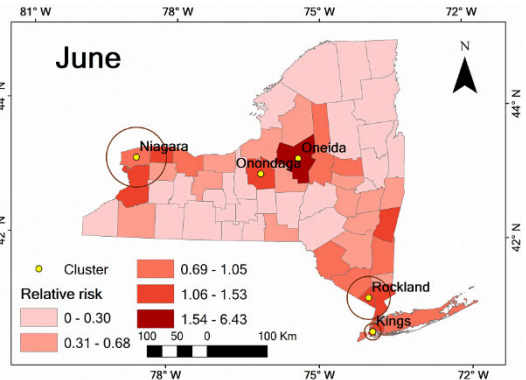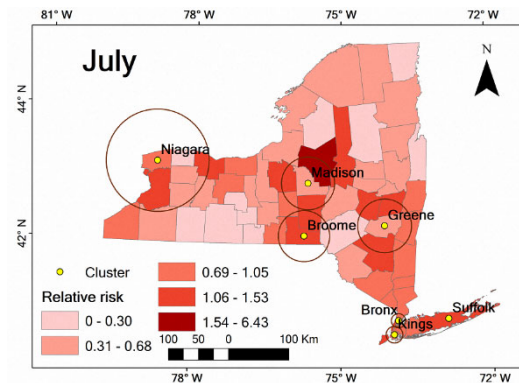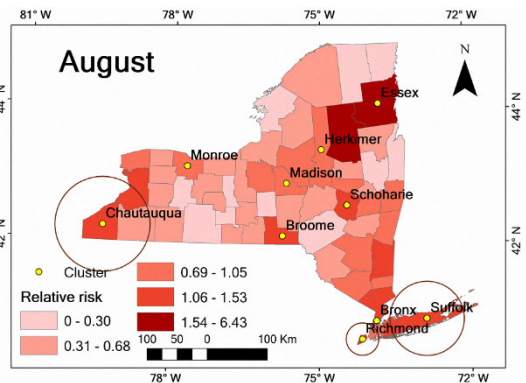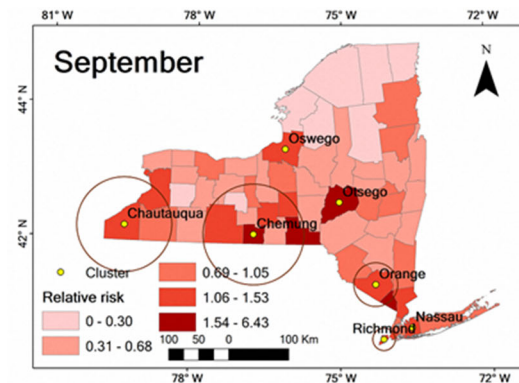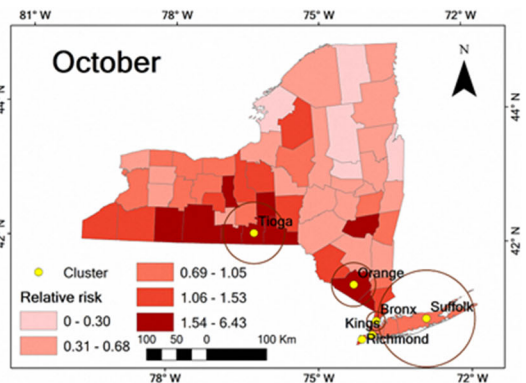

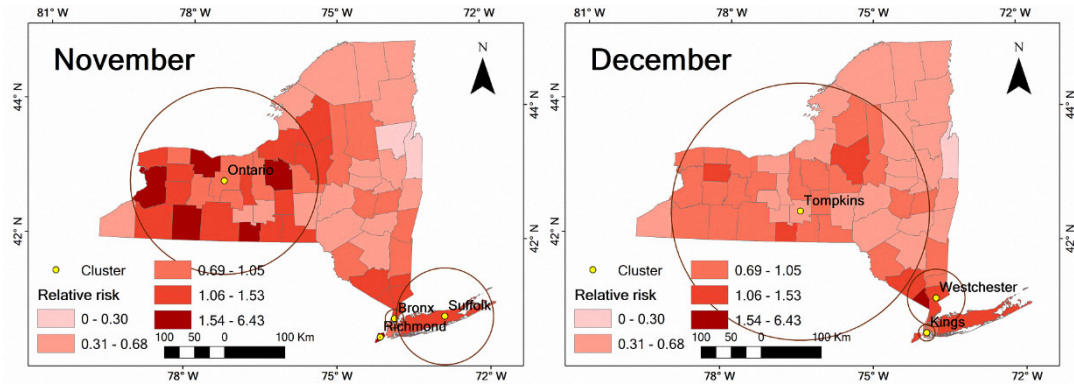

**Figure S4.** the COVID-19 spatiotemporal gathering area in 62 counties of New York State (March to December, 2020).

**Table S1.** Spatiotemporal scan statistics on the monthly cases.

| Month  | Cluster class | Cluster center | Radius (Km) | Time                  | Observed | Expected  | RR   | LLR       | P value |
|--------|---------------|----------------|-------------|-----------------------|----------|-----------|------|-----------|---------|
| March  | 1             | Westchester    | 47.73       | 2020/3/23 - 2020/3/31 | 28,166   | 6435.94   | 6.43 | 23,766.08 | <0.001  |
|        | 2             | Kings          | 13.87       | 2020/3/23 - 2020/3/31 | 19,457   | 5345.76   | 4.57 | 12,576.53 | <0.001  |
| April  | 1             | Nassau         | 25.88       | 2020/4/3 - 2020/4/11  | 37,603   | 17,835.50 | 2.32 | 9231.31   | <0.001  |
|        | 2             | Richmond       | 18.57       | 2020/4/3 - 2020/4/11  | 16,991   | 10,767.45 | 1.62 | 1616.19   | <0.001  |
|        | 3             | Albany         | 160.94      | 2020/4/2 - 2020/4/10  | 16,720   | 15,328.04 | 1.10 | 65.90     | <0.001  |
| May    | 1             | Nassau         | 25.88       | 2020/5/1 - 2020/5/9   | 10,596   | 4983.30   | 2.34 | 2645.41   | <0.001  |
|        | 2             | Richmond       | 18.57       | 2020/5/1 - 2020/5/9   | 5428     | 3008.47   | 1.88 | 830.52    | <0.001  |
|        | 3             | Albany         | 160.94      | 2020/5/1 - 2020/5/7   | 4710     | 3331.00   | 1.45 | 267.81    | <0.001  |
|        | 4             | Onondaga       | 0.00        | 2020/5/19 - 2020/5/25 | 461      | 354.93    | 1.30 | 14.55     | <0.001  |
| June   | 1             | Kings          | 13.87       | 2020/6/1 - 2020/6/8   | 2482     | 1495.05   | 1.74 | 294.57    | <0.001  |
|        | 2             | Rockland       | 35.68       | 2020/6/1 - 2020/6/7   | 1374     | 736.87    | 1.92 | 228.32    | <0.001  |
|        | 3             | Oneida         | 0.00        | 2020/6/22 - 2020/6/29 | 223      | 71.02     | 3.16 | 103.69    | <0.001  |
|        | 4             | Niagara        | 49.65       | 2020/6/1 - 2020/6/9   | 641      | 408.22    | 1.59 | 57.68     | <0.001  |
|        | 5             | Onondaga       | 0.00        | 2020/6/1 - 2020/6/7   | 222      | 125.15    | 1.78 | 30.60     | <0.001  |
| July   | 1             | Madison        | 43.94       | 2020/7/1 - 2020/7/9   | 449      | 245.64    | 1.85 | 68.43     | <0.001  |
|        | 2             | Bronx          | 11.85       | 2020/7/16 - 2020/7/24 | 1359     | 984.60    | 1.41 | 66.98     | <0.001  |
|        | 3             | Niagara        | 85.03       | 2020/7/9 - 2020/7/17  | 882      | 648.63    | 1.38 | 38.99     | <0.001  |
|        | 4             | Greene         | 44.62       | 2020/7/23 - 2020/7/30 | 348      | 214.00    | 1.64 | 35.62     | <0.001  |
|        | 5             | Suffolk        | 0.00        | 2020/7/9 - 2020/7/16  | 603      | 424.14    | 1.43 | 34.06     | <0.001  |
|        | 6             | Broome         | 42.46       | 2020/7/20 - 2020/7/26 | 116      | 59.74     | 1.95 | 20.79     | <0.001  |
| August | 1             | Chautauqua     | 78.71       | 2020/8/25 - 2020/8/31 | 509      | 257.05    | 2.01 | 97.43     | <0.001  |

|           |   |             |        |                         |         |           |      |            |        |
|-----------|---|-------------|--------|-------------------------|---------|-----------|------|------------|--------|
| September | 2 | Bronx       | 0.00   | 2020/8/12 - 2020/8/19   | 629     | 371.42    | 1.72 | 75.50      | <0.001 |
|           | 3 | Essex       | 0.00   | 2020/8/20 - 2020/8/28   | 63      | 10.87     | 5.81 | 58.65      | <0.001 |
|           | 4 | Schoharie   | 0.00   | 2020/8/21 - 2020/8/29   | 112     | 45.76     | 2.46 | 34.13      | <0.001 |
|           | 5 | Suffolk     | 61.66  | 2020/8/1 - 2020/8/8     | 950     | 742.07    | 1.29 | 27.88      | <0.001 |
|           | 6 | Richmond    | 26.93  | 2020/8/10 - 2020/8/16   | 1285    | 1068.95   | 1.22 | 21.75      | <0.001 |
|           | 1 | Orange      | 36.38  | 2020/9/22 - 2020/9/30   | 940     | 261.88    | 3.70 | 533.03     | <0.001 |
|           | 2 | Richmond    | 18.57  | 2020/9/22 - 2020/9/30   | 1853    | 1118.67   | 1.71 | 212.78     | <0.001 |
|           | 3 | Chemung     | 83.86  | 2020/9/24 - 2020/9/30   | 496     | 183.70    | 2.74 | 182.43     | <0.001 |
|           | 4 | Otsego      | 0.00   | 2020/9/1 - 2020/9/7     | 141     | 17.05     | 8.31 | 174.25     | <0.001 |
|           | 5 | Chautauqua  | 78.71  | 2020/9/1 - 2020/9/7     | 555     | 321.46    | 1.74 | 70.70      | <0.001 |
|           | 6 | Nassau      | 0.00   | 2020/9/11 - 2020/9/19   | 709     | 499.98    | 1.43 | 39.56      | <0.001 |
|           | 7 | Oswego      | 0.00   | 2020/9/13 - 2020/9/21   | 94      | 43.16     | 2.18 | 22.39      | <0.001 |
| October   | 1 | Tioga       | 51.03  | 2020/10/20 - 2020/10/28 | 1473    | 344.35    | 4.38 | 1025.44    | <0.001 |
|           | 2 | Orange      | 36.38  | 2020/10/1 - 2020/10/9   | 1752    | 518.61    | 3.47 | 915.28     | <0.001 |
|           | 3 | Richmond    | 0.00   | 2020/10/24 - 2020/10/31 | 606     | 308.83    | 1.97 | 112.24     | <0.001 |
|           | 4 | Kings       | 0.00   | 2020/10/2 - 2020/10/10  | 2373    | 1867.93   | 1.28 | 65.57      | <0.001 |
|           | 5 | Suffolk     | 80.46  | 2020/10/24 - 2020/10/31 | 3025    | 2465.39   | 1.24 | 62.57      | <0.001 |
| November  | 1 | Ontario     | 155.19 | 2020/11/21 - 2020/11/29 | 16775   | 8736.79   | 2.04 | 3155.36    | <0.001 |
|           | 2 | Suffolk     | 80.46  | 2020/11/22 - 2020/11/30 | 13921   | 8232.00   | 1.77 | 1748.87    | <0.001 |
|           | 3 | Richmond    | 0.00   | 2020/11/22 - 2020/11/30 | 2225    | 1031.20   | 2.18 | 522.43     | <0.001 |
|           | 4 | Bronx       | 15.41  | 2020/11/24 - 2020/11/30 | 9611    | 8928.91   | 1.08 | 27.19      | <0.001 |
| December  | 1 | Westchester | 47.73  | 2020/12/25 - 2020/12/31 | 355,337 | 86,991.70 | 5.25 | 264,053.00 | <0.001 |
|           | 2 | Kings       | 13.87  | 2020/12/25 - 2020/12/31 | 260,954 | 72,256.19 | 4.27 | 161,797.51 | <0.001 |
|           | 3 | Tompkins    | 213.86 | 2020/12/25 - 2020/12/31 | 254,828 | 87,330.33 | 3.39 | 117,608.06 | <0.001 |

**Table S2.** Detection results of Geometrical interval.

|       | Index | Temperature | Precipitation | PM 2.5 concentration | Unemployment rate | Population mobility | Population Density |
|-------|-------|-------------|---------------|----------------------|-------------------|---------------------|--------------------|
| March | q     | 0.7776      | 0.3154        | 0.2011               | 0.3593            | 0.3897              | 0.5722             |
|       | p     | 0.000       | 0.0022        | 0.0344               | 0.000             | 0.000               | 0.000              |
| April | q     | 0.7554      | 0.5006        | 0.2343               | 0.0187            | 0.2184              | 0.6086             |
|       | p     | 0.000       | 0.000         | 0.0156               | 0.8979            | 0.0190              | 0.000              |
| May   | q     | 0.4553      | 0.0963        | 0.5430               | 0.0963            | 0.2753              | 0.4739             |
|       | p     | 0.000       | 0.2722        | 0.000                | 0.2722            | 0.0095              | 0.000              |
| June  | q     | 0.3776      | 0.0575        | 0.3536               | 0.3236            | 0.1035              | 0.4356             |
|       | p     | 0.000       | 0.5206        | 0.0217               | 0.0196            | 0.2417              | 0.0032             |
| July  | q     | 0.2130      | 0.1037        | 0.1573               | 0.1850            | 0.0543              | 0.4204             |

|           |   |        |        |        |        |        |        |
|-----------|---|--------|--------|--------|--------|--------|--------|
| August    | p | 0.0900 | 0.4240 | 0.1717 | 0.1910 | 0.8893 | 0.0095 |
|           | q | 0.3070 | 0.0533 | 0.0558 | 0.1681 | 0.1178 | 0.2991 |
| September | p | 0.0316 | 0.5442 | 0.6144 | 0.2423 | 0.2403 | 0.0831 |
|           | q | 0.1169 | 0.1082 | 0.0095 | 0.1742 | 0.0401 | 0.1852 |
| October   | p | 0.2092 | 0.2081 | 0.9728 | 0.0727 | 0.6938 | 0.2167 |
|           | q | 0.1073 | 0.0623 | 0.0903 | 0.0410 | 0.1187 | 0.0261 |
| November  | p | 0.2672 | 0.4647 | 0.2824 | 0.6813 | 0.2186 | 0.8684 |
|           | q | 0.2575 | 0.1200 | 0.1068 | 0.1685 | 0.1823 | 0.1929 |
| December  | p | 0.0166 | 0.2401 | 0.3148 | 0.2272 | 0.0735 | 0.3934 |
|           | q | 0.1286 | 0.0339 | 0.1521 | 0.0507 | 0.1489 | 0.2587 |
|           | p | 0.3868 | 0.7672 | 0.2564 | 0.8765 | 0.4276 | 0.3735 |

**Table S3.** Detection results of Equal interval.

|           | Index | Population Density | Temperature | Precipitation | PM 2.5 concentration | Unemployment rate | Population mobility |
|-----------|-------|--------------------|-------------|---------------|----------------------|-------------------|---------------------|
| March     | q     | 0.2055             | 0.7645      | 0.3207        | 0.2011               | 0.3045            | 0.4855              |
|           | p     | 0.5502             | 0.000       | 0.0024        | 0.0344               | 0.000             | 0.000               |
| April     | q     | 0.1936             | 0.8256      | 0.4155        | 0.2796               | 0.0303            | 0.3528              |
|           | p     | 0.5597             | 0.000       | 0.000         | 0.0035               | 0.7780            | 0.000               |
| May       | q     | 0.1880             | 0.4591      | 0.1298        | 0.5689               | 0.3224            | 0.2659              |
|           | p     | 0.7401             | 0.000       | 0.1554        | 0.000                | 0.1504            | 0.0420              |
| June      | q     | 0.1668             | 0.3776      | 0.0575        | 0.2921               | 0.3236            | 0.1134              |
|           | p     | 0.8570             | 0.000       | 0.5206        | 0.0781               | 0.0196            | 0.1699              |
| July      | q     | 0.0711             | 0.2130      | 0.1037        | 0.1573               | 0.1850            | 0.0543              |
|           | p     | 0.9914             | 0.0900      | 0.4240        | 0.1717               | 0.1910            | 0.8893              |
| August    | q     | 0.0620             | 0.1839      | 0.0578        | 0.0631               | 0.1540            | 0.0892              |
|           | p     | 0.9827             | 0.2100      | 0.5956        | 0.9344               | 0.8612            | 0.7767              |
| September | q     | 0.0054             | 0.1679      | 0.0908        | 0.0869               | 0.0079            | 0.0360              |
|           | p     | 0.9944             | 0.2410      | 0.2985        | 0.6584               | 0.9926            | 0.6539              |
| October   | q     | 0.0041             | 0.1073      | 0.0911        | 0.0851               | 0.0029            | 0.1171              |
|           | p     | 0.9830             | 0.2672      | 0.2983        | 0.3344               | 0.9988            | 0.1468              |
| November  | q     | 0.2854             | 0.0728      | 0.0814        | 0.0100               | 0.1933            | 0.0093              |
|           | p     | 0.0259             | 0.6247      | 0.8979        | 0.9930               | 0.0307            | 0.9937              |
| December  | q     | 0.0558             | 0.0348      | 0.2655        | 0.1224               | 0.0270            | 0.0294              |
|           | p     | 0.9576             | 0.9278      | 0.1146        | 0.8157               | 0.9991            | 0.9912              |

**Table S4.** Interactive detection results.

| Month | Impacting factors    | Population Density | Unemployment rate | Temperature | Precipitation | PM 2.5 concentration | population mobility |
|-------|----------------------|--------------------|-------------------|-------------|---------------|----------------------|---------------------|
| March | Population Density   | 0.8167             |                   |             |               |                      |                     |
|       | Unemployment rate    | 0.8589             | 0.3321            |             |               |                      |                     |
|       | Temperature          | 0.9590             | 0.7715            | 0.7645      |               |                      |                     |
|       | Precipitation        | 0.9046             | 0.7451            | 0.8984      | 0.3746        |                      |                     |
|       | PM 2.5 concentration | 0.9046             | 0.7451            | 0.8984      | 0.3847        | 0.3746               |                     |
|       | population mobility  | 0.8300             | 0.5313            | 0.8903      | 0.5950        | 0.5950               | 0.3152              |
|       | Population Density   | 0.7012             |                   |             |               |                      |                     |
| April | Unemployment rate    | 0.7213             | 0.0322            |             |               |                      |                     |
|       | Temperature          | 0.9027             | 0.8613            | 0.8260      |               |                      |                     |
|       | Precipitation        | 0.8440             | 0.7840            | 0.9142      | 0.6195        |                      |                     |
|       | PM 2.5 concentration | 0.7949             | 0.5346            | 0.8553      | 0.7533        | 0.3764               |                     |
|       | population mobility  | 0.7724             | 0.5757            | 0.8619      | 0.9426        | 0.8549               | 0.4343              |
|       |                      |                    |                   |             |               |                      |                     |



|           |                      |        |        |        |        |        |        |
|-----------|----------------------|--------|--------|--------|--------|--------|--------|
| May       | Population Density   | 0.3889 |        |        |        |        |        |
|           | Unemployment rate    | 0.5874 | 0.2465 |        |        |        |        |
|           | Temperature          | 0.5777 | 0.6698 | 0.4551 |        |        |        |
|           | Precipitation        | 0.5595 | 0.5857 | 0.5616 | 0.0842 |        |        |
|           | PM 2.5 concentration | 0.6723 | 0.6472 | 0.7451 | 0.6334 | 0.5281 |        |
|           | population mobility  | 0.5327 | 0.4909 | 0.6106 | 0.4573 | 0.7105 | 0.1939 |
|           | Population Density   | 0.4171 |        |        |        |        |        |
| June      | Unemployment rate    | 0.6001 | 0.3013 |        |        |        |        |
|           | Temperature          | 0.5275 | 0.5363 | 0.3240 |        |        |        |
|           | Precipitation        | 0.6824 | 0.4888 | 0.7401 | 0.0429 |        |        |
|           | PM 2.5 concentration | 0.7416 | 0.7963 | 0.7079 | 0.4764 | 0.3018 |        |
|           | population mobility  | 0.4413 | 0.6193 | 0.5350 | 0.3958 | 0.4413 | 0.1663 |
|           | Population Density   | 0.4734 |        |        |        |        |        |
|           | Unemployment rate    | 0.5590 | 0.2266 |        |        |        |        |
| July      | Temperature          | 0.6209 | 0.3728 | 0.2485 |        |        |        |
|           | Precipitation        | 0.7257 | 0.4750 | 0.5114 | 0.1203 |        |        |
|           | PM 2.5 concentration | 0.6954 | 0.4898 | 0.3834 | 0.3715 | 0.0942 |        |
|           | population mobility  | 0.5651 | 0.4603 | 0.6190 | 0.5680 | 0.3010 | 0.1453 |
|           | Population Density   | 0.5185 |        |        |        |        |        |
|           | Unemployment rate    | 0.3111 | 0.2597 |        |        |        |        |
|           | Temperature          | 0.4939 | 0.4491 | 0.1746 |        |        |        |
| August    | Precipitation        | 0.4352 | 0.4647 | 0.3375 | 0.0237 |        |        |
|           | PM 2.5 concentration | 0.7737 | 0.6243 | 0.5798 | 0.4274 | 0.5798 |        |
|           | population mobility  | 0.6619 | 0.6284 | 0.4467 | 0.3825 | 0.4757 | 0.1347 |
|           | Population Density   | 0.2193 |        |        |        |        |        |
|           | Unemployment rate    | 0.4568 | 0.2168 |        |        |        |        |
|           | Temperature          | 0.3206 | 0.4609 | 0.1320 |        |        |        |
|           | Precipitation        | 0.5199 | 0.5685 | 0.2578 | 0.1059 |        |        |
| September | PM 2.5 concentration | 0.3943 | 0.3868 | 0.2690 | 0.3711 | 0.0522 |        |
|           | population mobility  | 0.5880 | 0.4767 | 0.3019 | 0.4307 | 0.3013 | 0.1302 |
|           | Population Density   | 0.0200 |        |        |        |        |        |
|           | Unemployment rate    | 0.0675 | 0.0426 |        |        |        |        |
|           | Temperature          | 0.1359 | 0.1544 | 0.1000 |        |        |        |
|           | Precipitation        | 0.1427 | 0.1741 | 0.2864 | 0.0940 |        |        |
|           | PM 2.5 concentration | 0.1446 | 0.1690 | 0.2552 | 0.3832 | 0.0858 |        |
| October   | population mobility  | 0.1646 | 0.1901 | 0.2898 | 0.3008 | 0.3177 | 0.0684 |
|           | Population Density   | 0.1681 |        |        |        |        |        |
| November  |                      |        |        |        |        |        |        |

|          |                      |        |        |        |        |        |        |
|----------|----------------------|--------|--------|--------|--------|--------|--------|
| December | Unemployment rate    | 0.3058 | 0.0977 |        |        |        |        |
|          | Temperature          | 0.5517 | 0.4594 | 0.2887 |        |        |        |
|          | Precipitation        | 0.3646 | 0.3861 | 0.5239 | 0.0698 |        |        |
|          | PM 2.5 concentration | 0.4859 | 0.4089 | 0.6194 | 0.5364 | 0.1182 |        |
|          | population mobility  | 0.5378 | 0.4263 | 0.6015 | 0.5064 | 0.4410 | 0.1565 |
|          | Population Density   | 0.2008 |        |        |        |        |        |
|          | Unemployment rate    | 0.4129 | 0.1156 |        |        |        |        |
|          | Temperature          | 0.4000 | 0.4845 | 0.5224 |        |        |        |
|          | Precipitation        | 0.5157 | 0.5152 | 0.5189 | 0.1105 |        |        |
|          | PM 2.5 concentration | 0.4888 | 0.5029 | 0.4886 | 0.4875 | 0.1683 |        |
|          | population mobility  | 0.4643 | 0.2924 | 0.5152 | 0.4742 | 0.4113 | 0.1532 |
|          |                      |        |        |        |        |        |        |

 represents  $q > 0.9$ ; 
  represents  $q > 0.8$ ; 
  represents  $q > 0.7$ .
